# Supplementary material for: A New Score to Assess the Perioperative Period of the Cancer Patient Undergoing Non-Palliative Elective Surgery: A Retrospective Evaluation of a Case Report by PERIDIA Score
Source: Front Oncol. 2021 Oct 11;11:733621. doi: 10.3389/fonc.2021.733621 (PMC8577042; doi:10.3389/fonc.2021.733621)
Supplement: Supplementary file 1 [file Table_1.xlsx]

## Sheet: Sheet1
		PERIDIA score calculator																					TOT
		Insert 0=false 1=true
																										1
		Pre operative assessment						Tot	Intra operative assessment						Tot	Post operative assessment						Tot				2
																										3
																										4
		Frailty assessment							HR assessment							Morbidity assessment
		A) ≥2 hospitalizations in the last year						1	A) a change ≥10 b / min compared to baseline value						1	A) Intensive medical therapy						1
		B) Need for help with daily activities						0	B) a change ≥10 b / min compared to baseline value						1	B) New surgery under general anesthesia						0
		C) Sadness, depression, psychosis, neurodegen. dis.						1	C) a change ≥10 b / min compared to baseline value						1	C) New hospitalization in post-operative ICU						0
		D) No family members or care giver						1	D) a change ≥10 b / min compared to baseline value						1	D) Multiorgan dysfunction						0
		Frailty value (A+B+C+D)						3	HR value (A+B+C+D)						4	Morbidity value (A+B+C+D)						1
		Nutritional Status assessment							MAP assessment							Breathing assessment
		A) Weight loss in the last 3 months ≥4 kg						1	A) a change ≥20 mmHg compared to baseline value						1	A) HR ≥120/min or RR ≥35/min						1
		B) Sedentarism (transition from bed to chair)						0	B) a change ≥20 mmHg compared to baseline value						1	B) Ph ≤7.3						1
		C) Previous major surgery (thoracic, abdominal)						1	C) a change ≥20 mmHg compared to baseline value						1	C) GCS ≤10						0
		D) BMI ≤21 or ≥30						1	D) a change ≥20 mmHg compared to baseline value						1	D) PaO2/FiO2 ≤150						0
		Nutritional Status value (A+B+C+D)						3	MAP value (A+B+C+D)						4	Breathing value (A+B+C+D)						2
		Comorbidity assessment							SpO2 assessment							Hepato-Renal Status assessment
		A) Age ≥70						1	A) a change ≥5% compared to baseline value						1	A) Total Bilirubin ≥ 51.3 umol/L						1
		B) SpO2 ≤90 in air or need for oxygen therapy or NIV						0	B) a change ≥5% compared to baseline value						0	B) Albumin ≤ 28 g/L						1
		C) Hb ≤6.21 mmol/L						1	C) a change ≥5% compared to baseline value						0	C) INR ≥2						1
		D) AMI/Heart fail/Lung inf/DM org dam/Liver dam/M						1	D) a change ≥5% compared to baseline value						0	D) Creatinine ≥ 0.18 mmol/L						0
		Comorbidity value (A+B+C+D)						3	SpO2 value (A+B+C+D)						1	Hepato-Renal Status value (A+B+C+D)						3
		Anaesthesiology Rescue assessment							EtCO2 assessment							Sepsis assessment
		1 point for ASA II						3	A) a change ≥5 mmHg compared to baseline value						1	A) Severe sepsis with acute organ dysfunction						0
		2 point for ASA III							B) a change ≥5 mmHg compared to baseline value						0	B) Septic shock with drug support						0
		3 point for ASA IV							C) a change ≥5 mmHg compared to baseline value						0	C) Hospital infection						0
		4 point for ASA V							D) a change ≥5 mmHg compared to baseline value						0	D) Immunosuppression						1
		Anaesthesiology Rescue value (insert value 1-4)							EtCO2 value (A+B+C+D)						1	Sepsis value (A+B+C+D)						1
		Pre operative value						12	Intra operative value						10	Post operative value						7	29
		(Frailty + Nutritional St. + Comorbidity + Anaesth. Resc.)							(HR + MAP + SpO2 + EtCO2)							(Morbidity + Breathing + Hepato-Renal St. + Sepsis)
PERIDIA TOT = {Pre operatory value + Intra operatory value + Post operatory value} PERIDIA TOT = {[∑FrailtyA→D + ∑Nutritional St.A→D + ∑ComorbidityA→D + Anaesth.Resc. + ∑HRA→D + ∑MAPA→D + ∑SpO2A→D + ∑EtCO2A→D + ∑MorbidityA→D + ∑BreathingA→D + ∑Hepato-Renal St.A→D +∑SepsisA→D]}
